# Supplementary material
Source: PubMed Central journal article supplement (PMC4670294)

**mdr2<sup>-/-</sup> CV ileum****A.**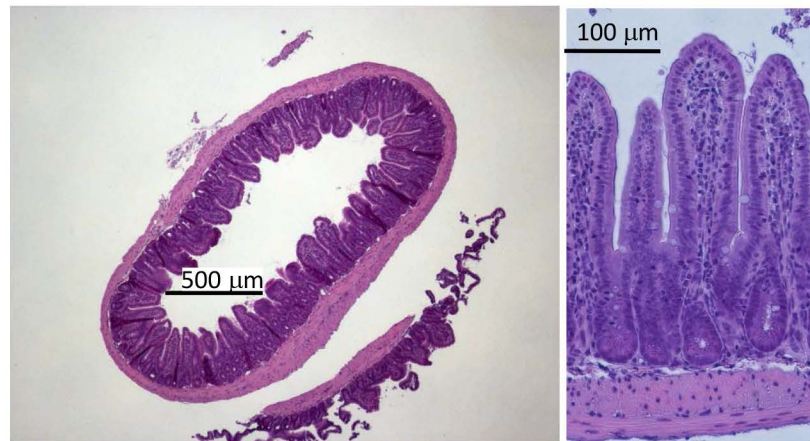**mdr2<sup>-/-</sup> GF ileum****B.**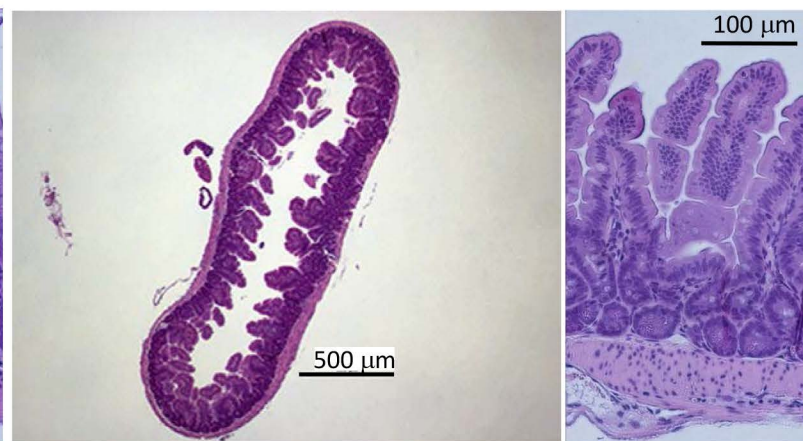**Villi length  
C. (μm)**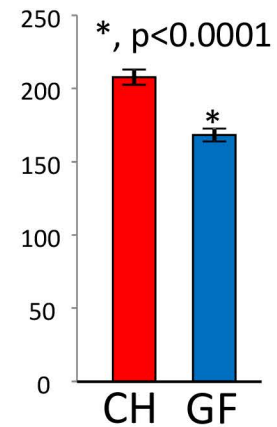**D. MDR2<sup>-/-</sup> CV colon**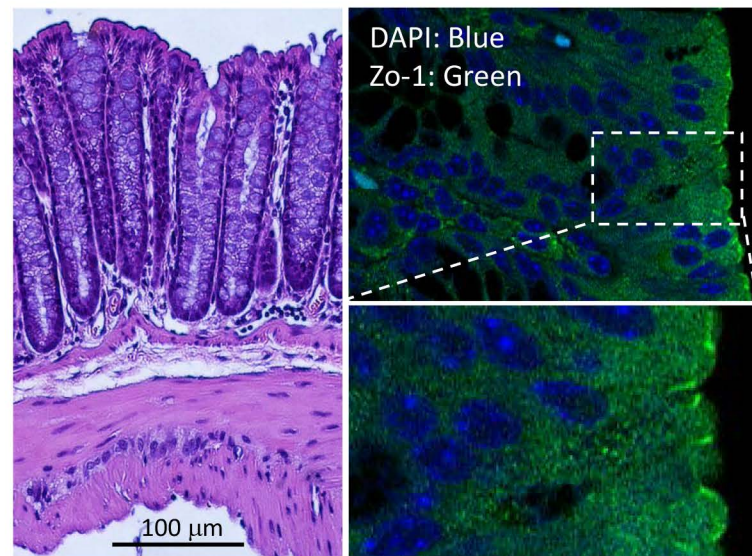**E. MDR2<sup>-/-</sup> GF colon**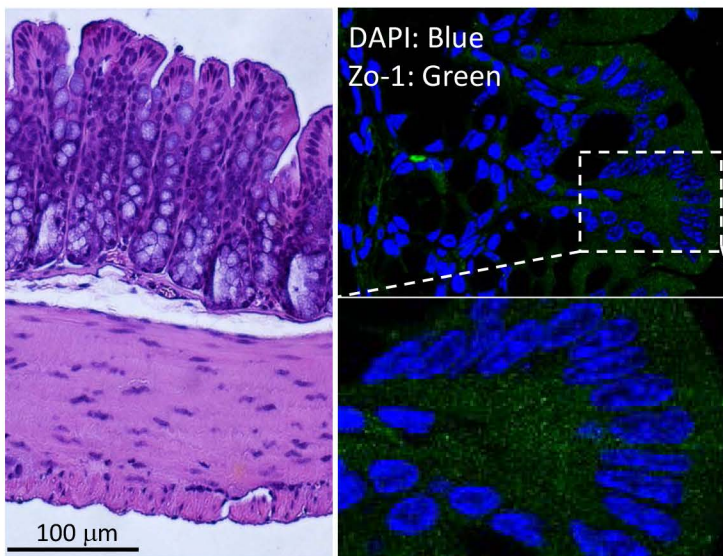**Crypt depth  
F. (μm)**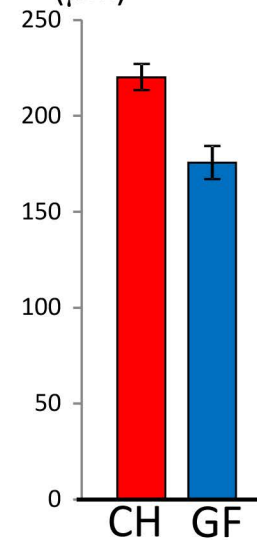

**A.**

Alkaline phosphatase (U/L)

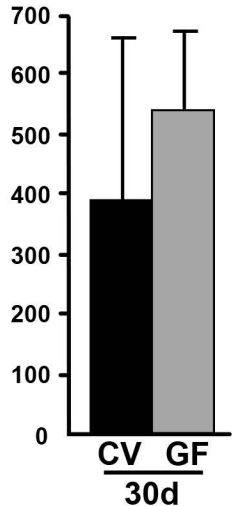**B.**

Aspartate aminotransferase (U/L)

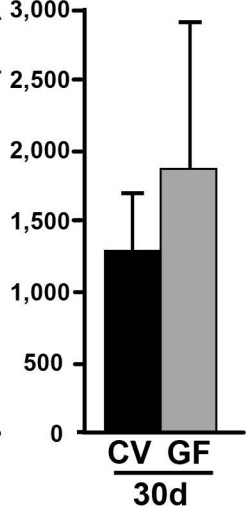**C.**

Total bilirubin (mg/dL)

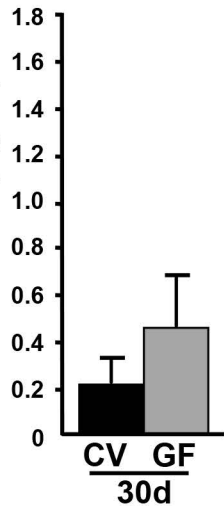**D.**Serum bile acids ( $\mu$ M/L)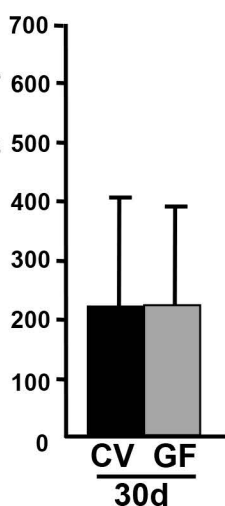**E.**

Alanine aminotransferase (U/L)

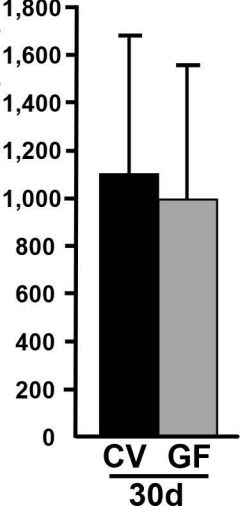

**A.**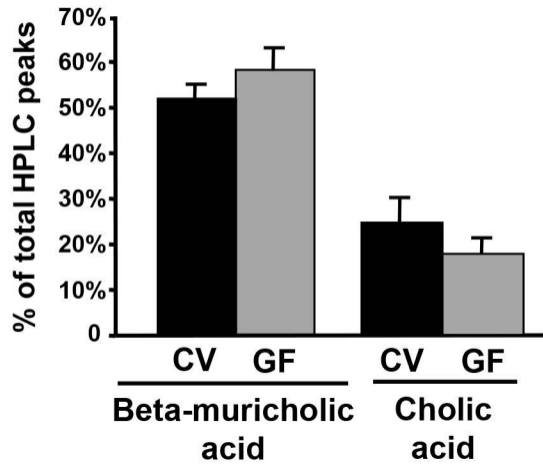**B.**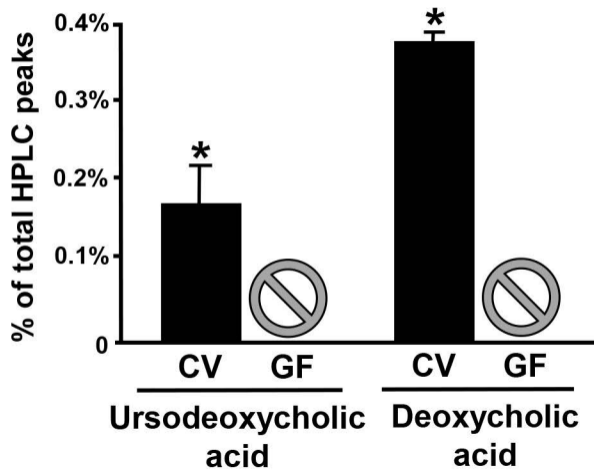

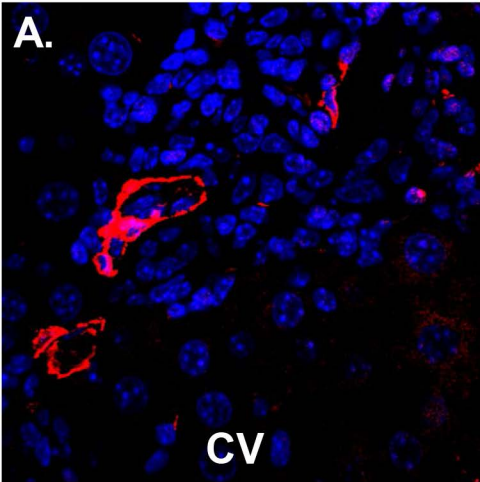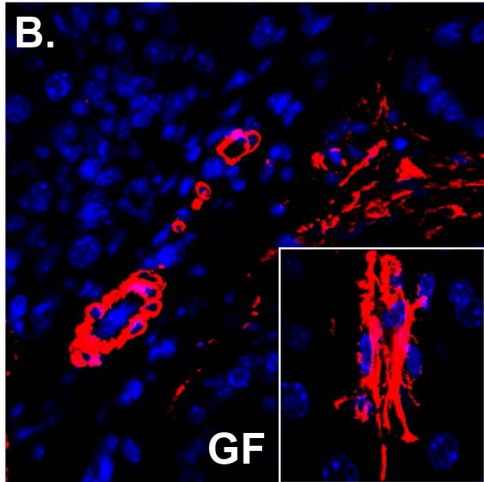

**Murine liver section confocal immunofluorescence microscopy.  
(Red,  $\alpha$ -smooth muscle actin; Blue, DAPI)**

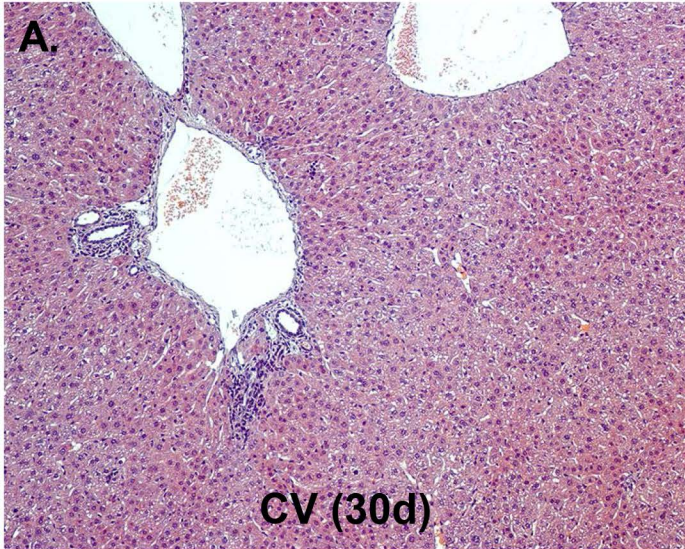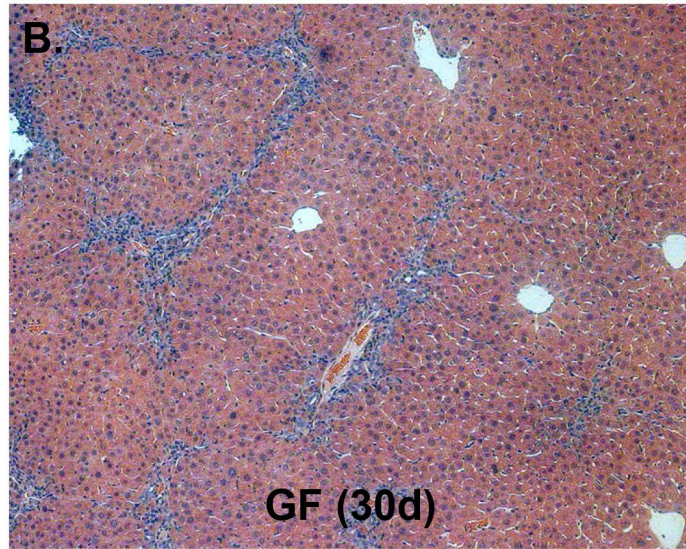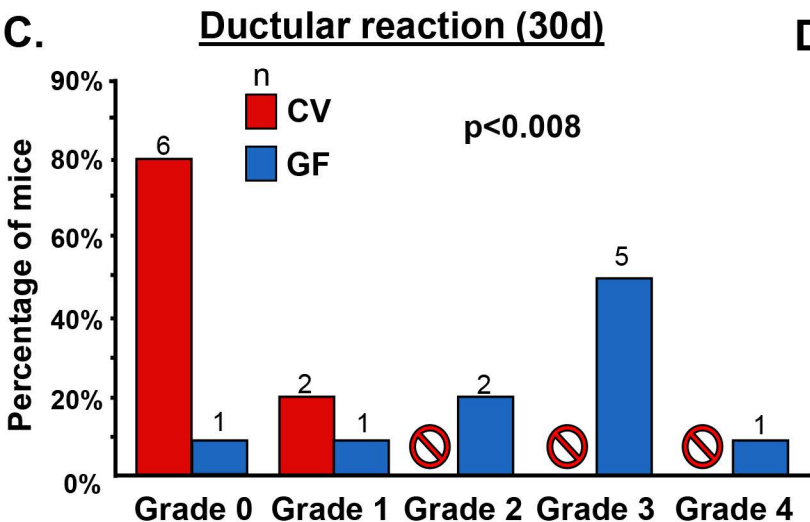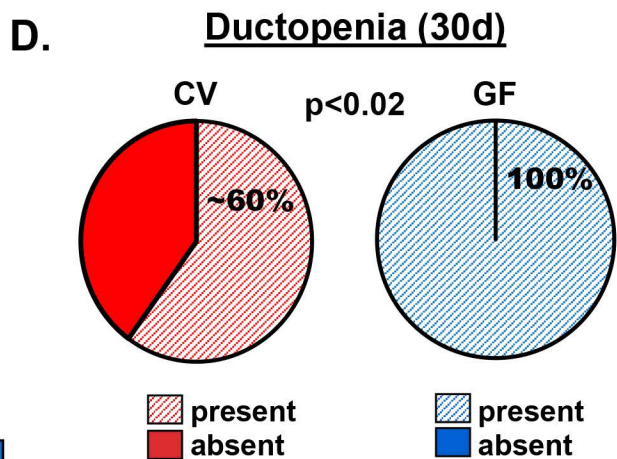

CD8+

*mdr2*<sup>-/-</sup> CV

*mdr2*<sup>-/-</sup> GF

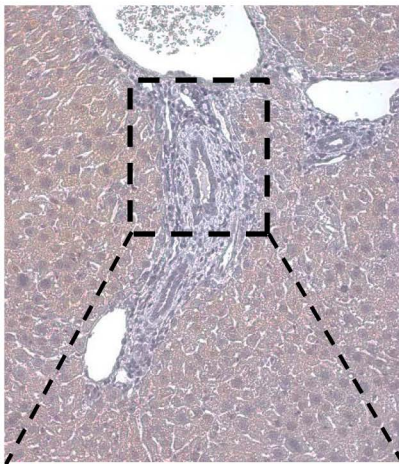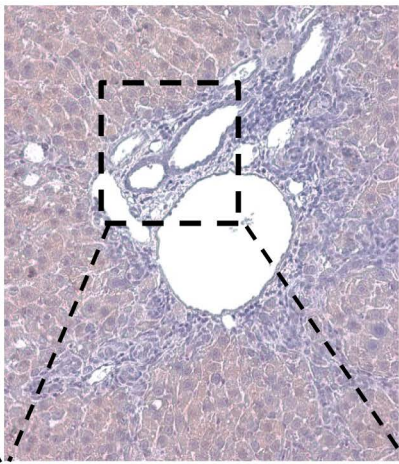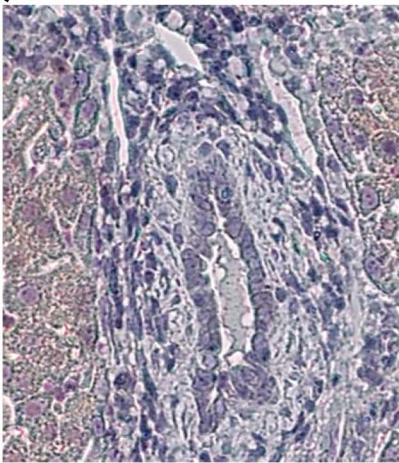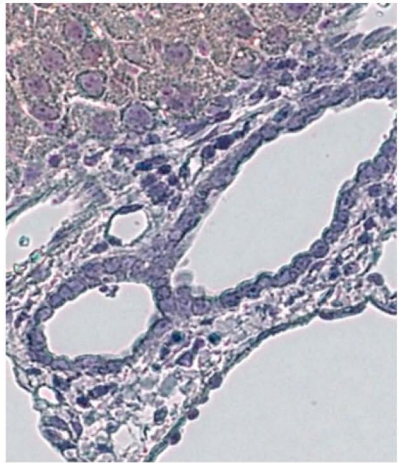

Supplement: NIHMS698362-supplement-Supp_MaterialS1.pdf [file NIHMS698362-supplement-Supp_MaterialS1.pdf]
